# Supplementary material for: Mapping of single-site magnetic anisotropy tensors in weakly coupled spin clusters by torque magnetometry
Source: Royal Society of Chemistry journal article supplement (doi:10.1039/c4cp02462a), 2014-07-02
Supplement: c4cp02462a1.pdf [file c4cp02462a1.pdf]

# Mapping of single-site magnetic anisotropy tensors in weakly coupled spin clusters by torque magnetometry†

Luca Rigamonti,<sup>a</sup> Andrea Cornia,<sup>\*a</sup> Andrea Nava,<sup>a,b</sup> Marie-Emmanuelle Boulon,<sup>c,†</sup> Mauro Perfetti,<sup>c</sup> Anne-Laure Barra,<sup>d</sup> Xiaoliang Zhong,<sup>e</sup> Kyungwha Park,<sup>e</sup> and Roberta Sessoli<sup>c</sup>

<sup>a</sup> *Dipartimento di Scienze Chimiche e Geologiche, Università degli Studi di Modena e Reggio Emilia & INSTM RU of Modena and Reggio Emilia, via G. Campi 183, 41125 Modena, Italy. E-mail: andrea.cornia@unimore.it*

<sup>b</sup> *Dipartimento di Scienze Fisiche, Informatiche e Matematiche, Università degli Studi di Modena e Reggio Emilia, via G. Campi 183, 41125 Modena, Italy.*

<sup>c</sup> *Laboratory of Molecular Magnetism (LaMM), Dipartimento di Chimica 'Ugo Schiff', Università degli Studi di Firenze & INSTM RU of Firenze, via della Lastruccia 3-13, 50019 Sesto Fiorentino (FI), Italy.*

<sup>d</sup> *Laboratoire National des Champs Magnétiques Intenses, CNRS, BP166, 25 Avenue des Martyrs, 38042 Grenoble Cedex 9, France.*

<sup>e</sup> *Department of Physics, Virginia Tech, Blacksburg Virginia 24060, USA.*

<sup>†</sup> Present address: Photon Science Institute, EPSRC School of Chemistry, The University of Manchester, Oxford Road, Manchester M13 9PL, UK.

## SUPPORTING INFORMATION

pg. S2 **Fig. S1** Details on the geometry of the torque measurements.

pg. S3 **Fig. S2** Infrared spectra of  $[\text{H}_3\text{La}(\text{tea})_2]$ , **Fe<sub>3</sub>La** and  $[\text{Fe}_2(\mu\text{-OMe})_2(\text{dpm})_4]$  as KBr disks.

pg. S5 **Fig. S3** Structure of the *ppp* and *sss* isomers in crystals of **Fe<sub>3</sub>La**.

pg. S6 **Fig. S4** Curie-Weiss plot for **Fe<sub>3</sub>La**.

pg. S7 **Fig. S5** Isothermal molar magnetization vs.  $H/T$  data for **Fe<sub>3</sub>La**.

pg. S8 **Fig. S6** Frequency dependence of the in-phase,  $\chi'_M$ , and out-of-phase,  $\chi''_M$ , AC susceptibilities for **Fe<sub>3</sub>La** in zero and 1-kOe applied static fields and in the 1.9–3.5 K temperature range.

pg. S9 **Fig. S7** Additional torque data measured on **Fe<sub>3</sub>La** at 5.5 K and 30 kOe.

pg. S10 **Figs. S8-S10** Calculated torque data for various sets of spin-Hamiltonian parameters.

pg. S15 **Figs. S11-S12** Internal energy and free energy surfaces of **Fe<sub>3</sub>La** computed with the set of best-fit spin-Hamiltonian parameters.

pg. S17 **Figs. S13-S14** EPR powder spectra of **Fe<sub>3</sub>La** at 331.2 and 220.8 GHz and at 5 and 10 K.

pg. S19 **Fig. S15** Details on the experimental and calculated EPR spectra of **Fe<sub>3</sub>La** at 240.0 GHz and at 5 K.

pg. S20 **Fig. S16**: Free energy surface of **Fe<sub>4</sub>** computed using van Wüllen single-ion parameters.

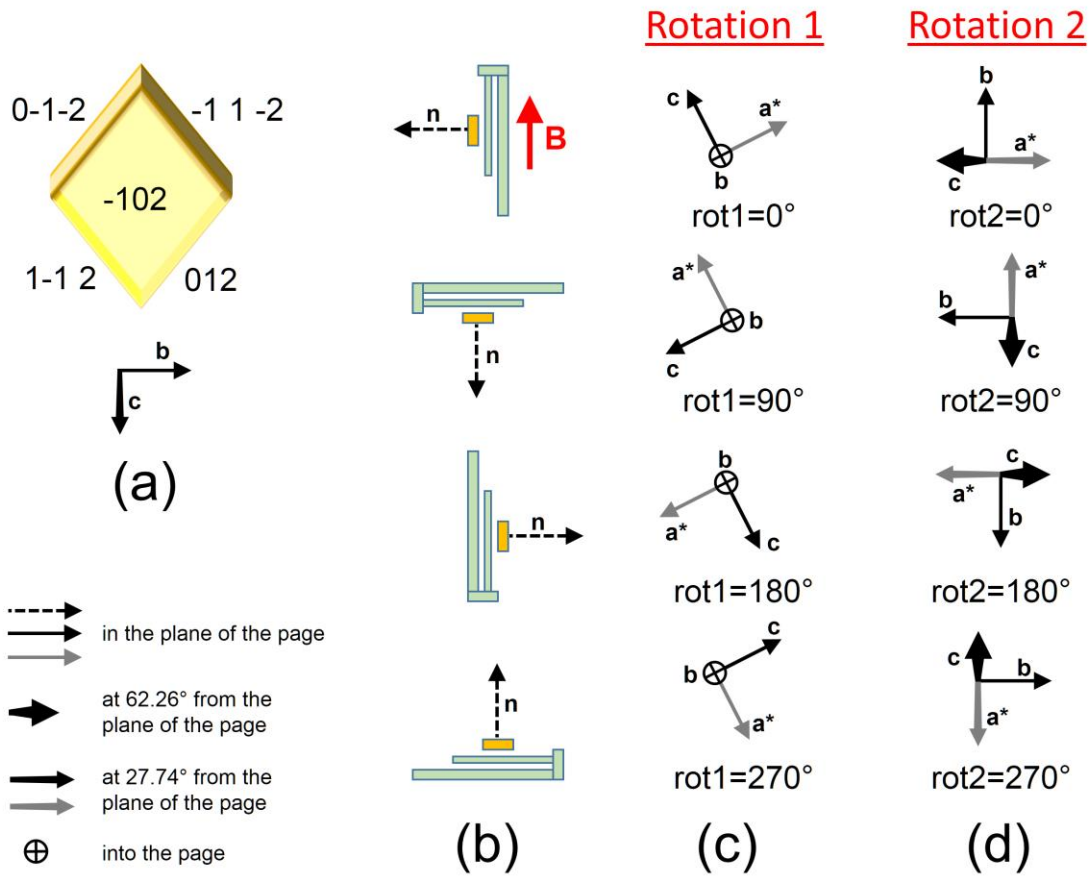

**Fig. S1** Details on the geometry of torque measurements. In (a) we show face indices and the arrangement of the crystallographic axes, while in (b-d) we present the orientation of the cantilever (b) and of the crystallographic axes in the course of the two rotations for four different values of the setting angles (c, d).

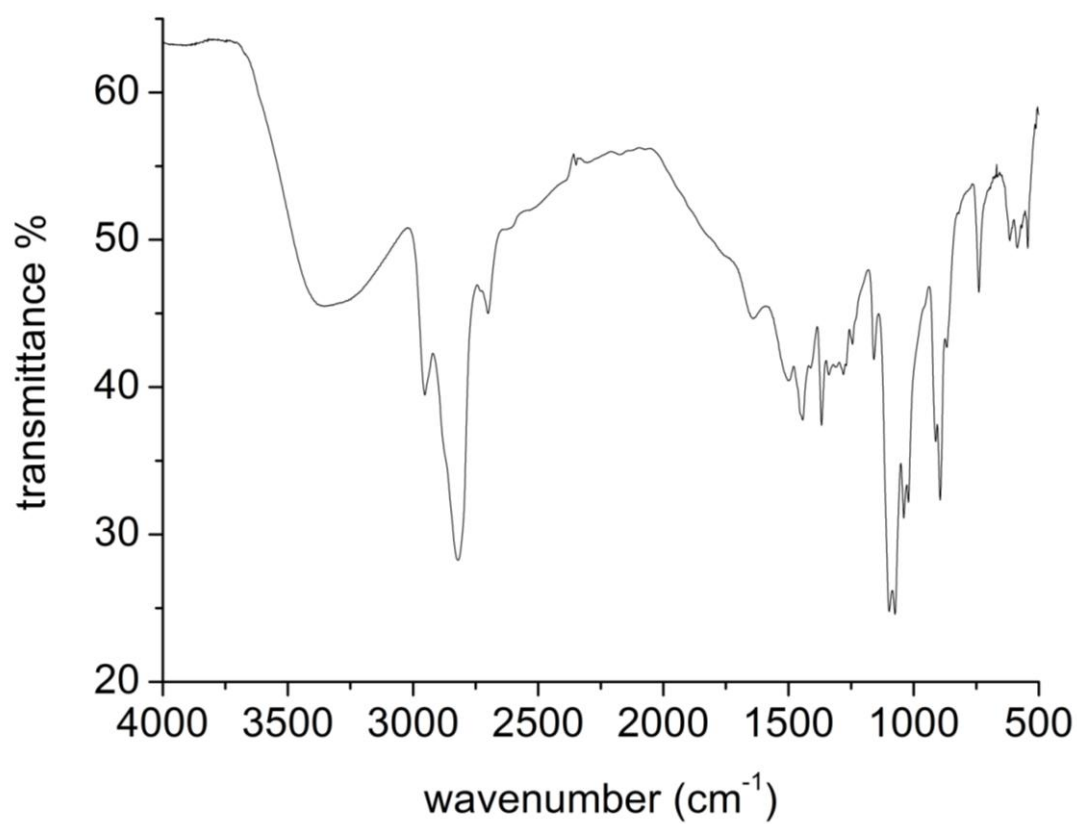

(a)

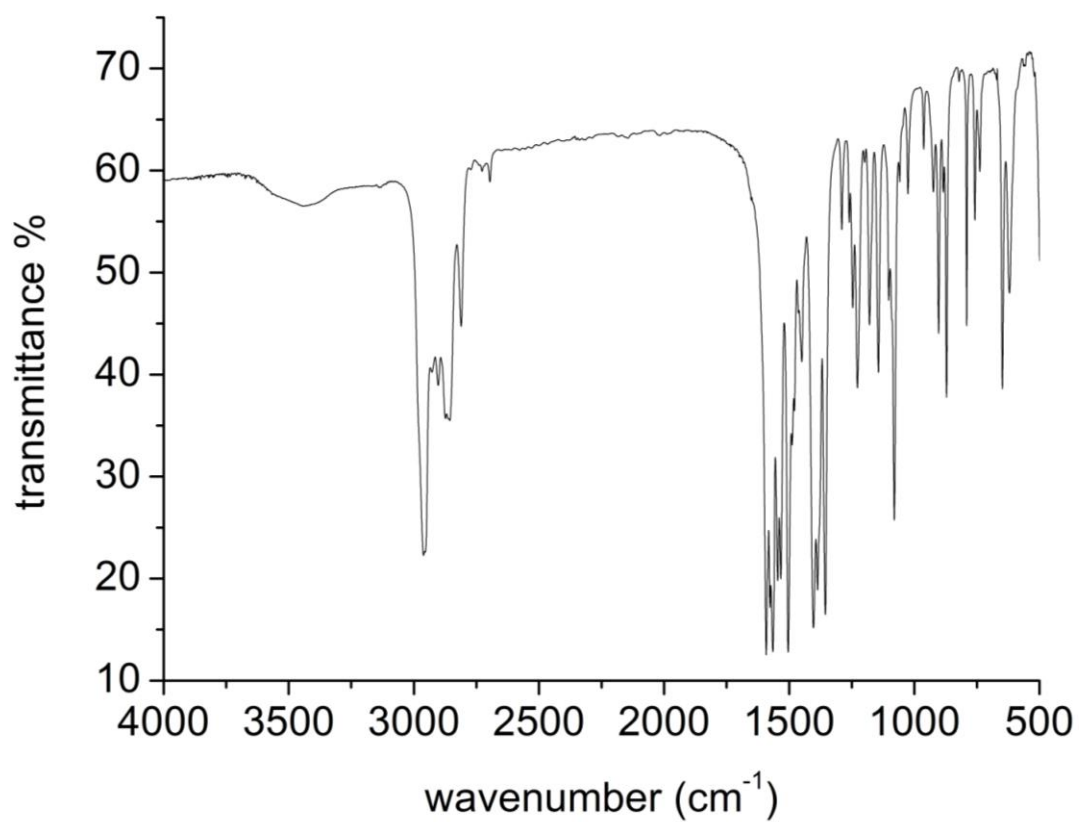

(b)

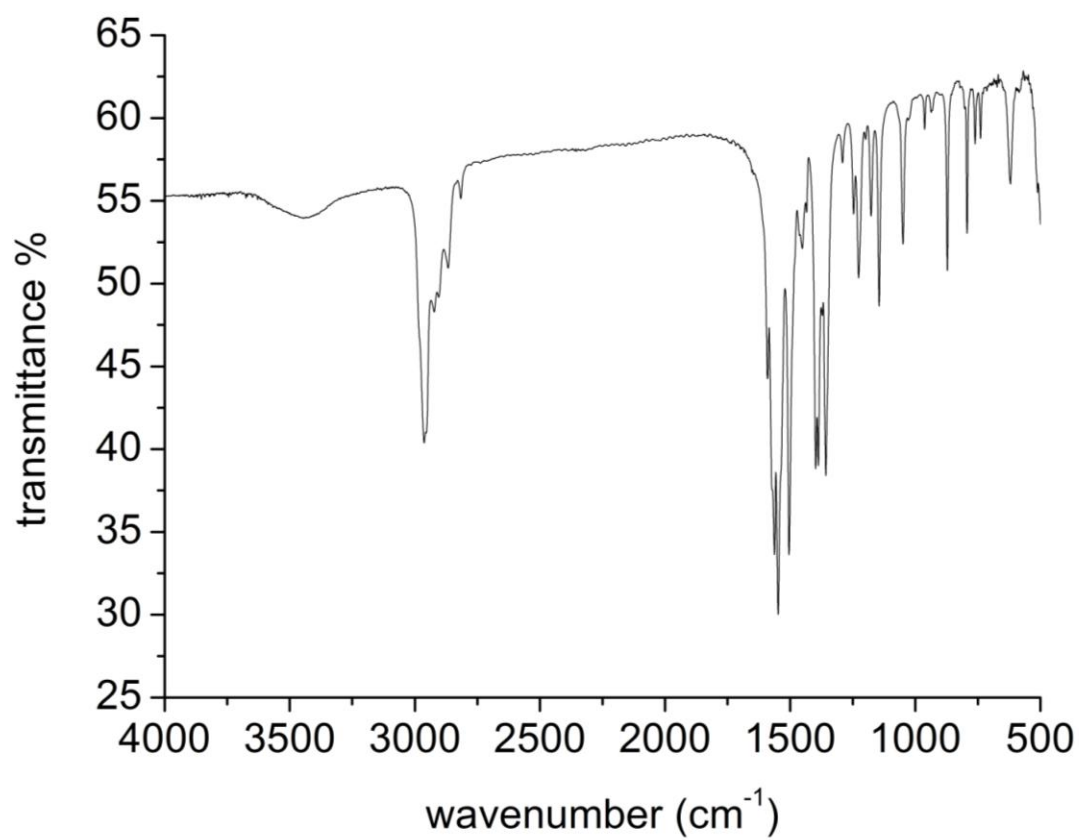

**Fig. S2** Infrared spectra of  $[\text{H}_3\text{La}(\text{tea})_2]$  (a),  $\text{Fe}_3\text{La}$  (b), and  $[\text{Fe}_2(\mu\text{-OMe})_2(\text{dpm})_4]$  (c) as KBr disks.

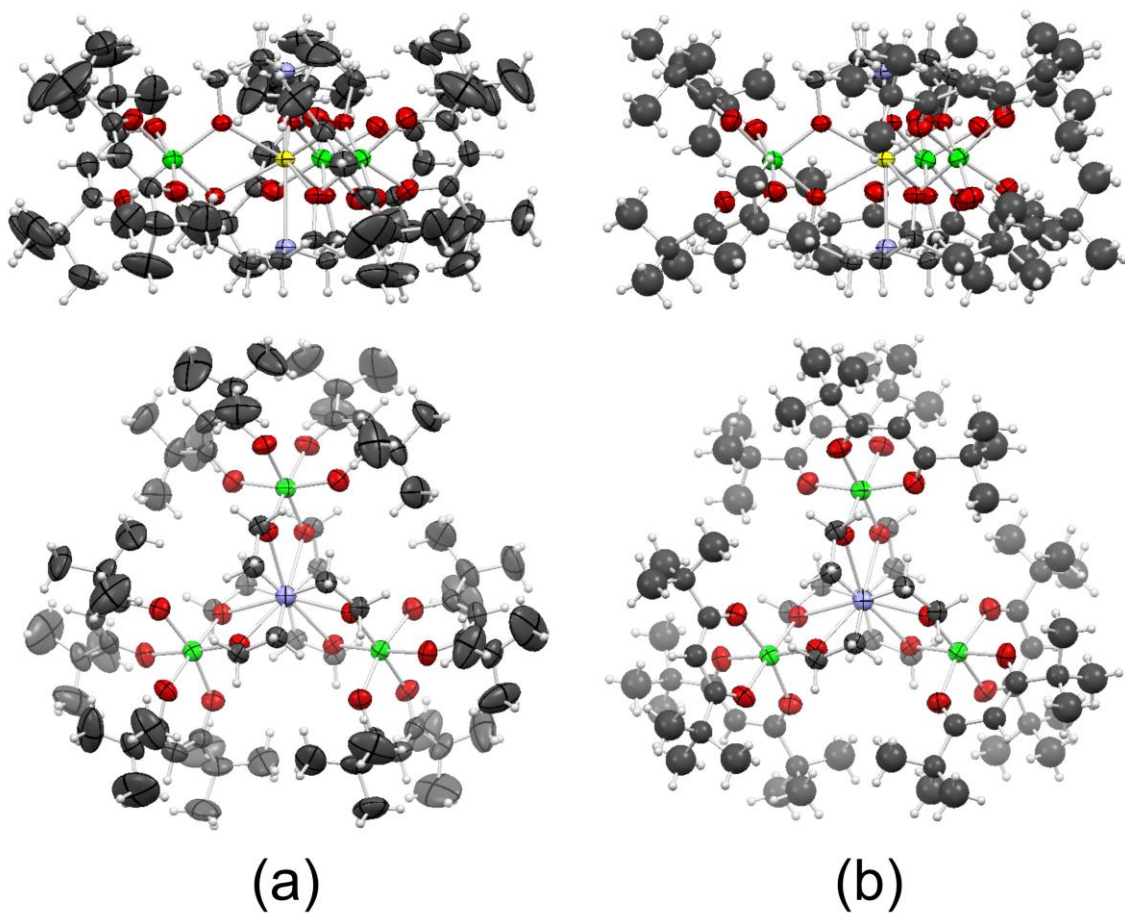

**Fig. S3** Side and top views of the *ppp* (a) and *sss* (b) isomers in crystals of **Fe<sub>3</sub>La** (La = yellow, Fe = green, O = red, N = blue, C = grey, H = white). Displacement ellipsoids are drawn at 40% probability level.

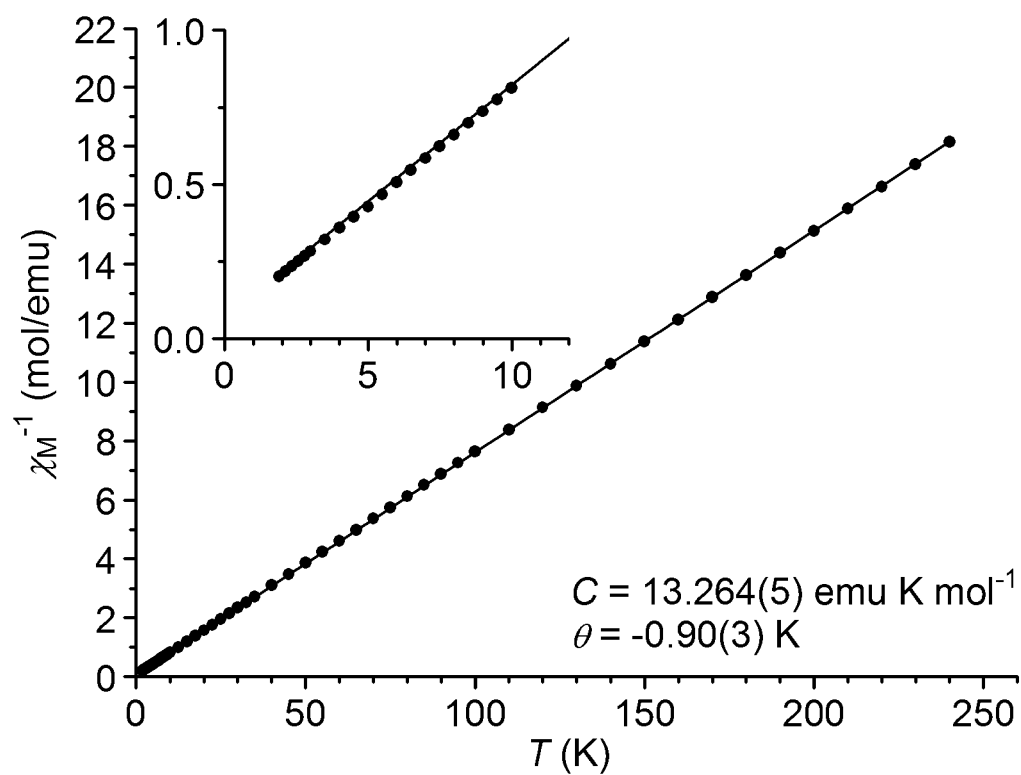

**Fig. S4** Curie-Weiss plot for  $\text{Fe}_3\text{La}$ . The inset displays an enlargement of the low-temperature region.

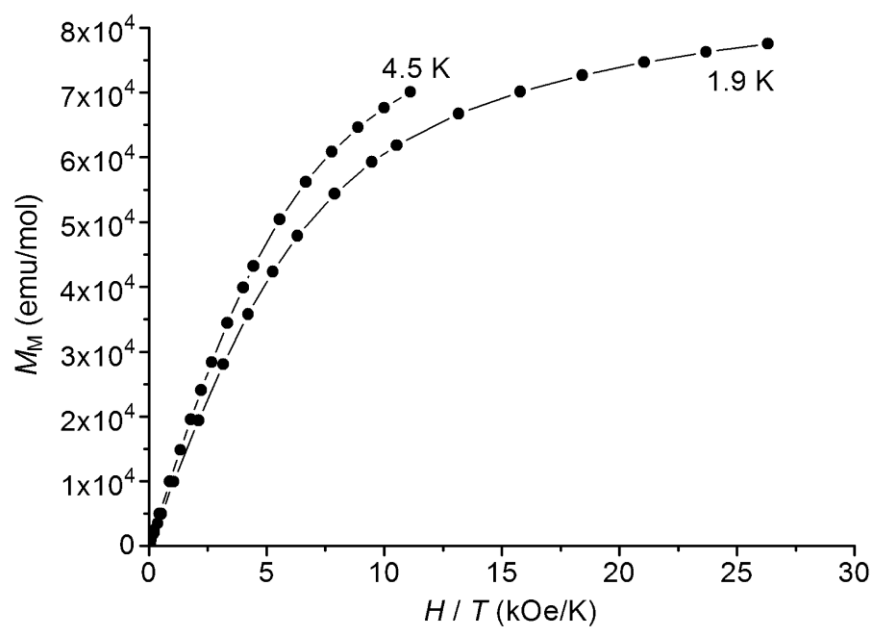

**Fig. S5** Isothermal molar magnetization  $M_M$  vs.  $H/T$  data for **Fe<sub>3</sub>La**. The nesting of curves recorded at different temperatures indicates departures from Brillouin function due to magnetic anisotropy and/or spin-spin interactions.

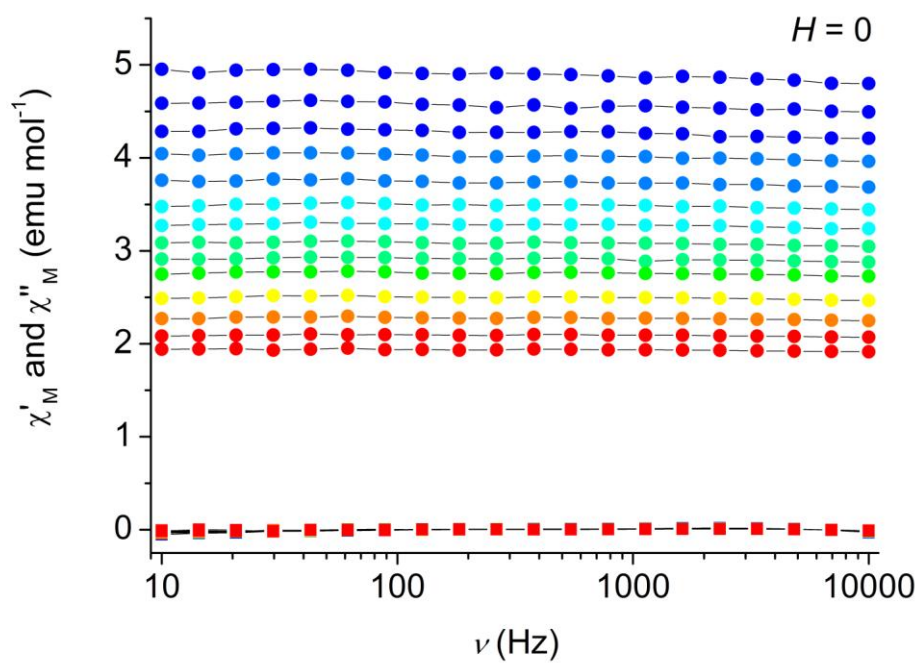

(a)

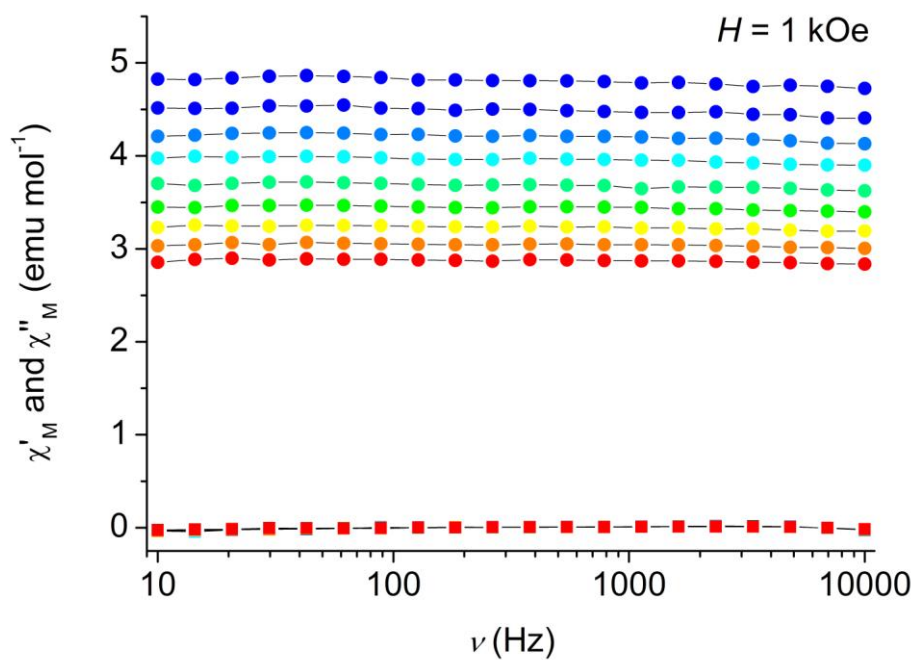

(b)

**Fig. S6** Frequency dependence of the in-phase  $\chi'_M$  (●) and out-of-phase  $\chi''_M$  (■) AC susceptibilities of compound **Fe<sub>3</sub>La** in zero (a) and 1-kOe (b) applied static fields and in the temperature range from 1.9 (red) to 3.5 K (blue).



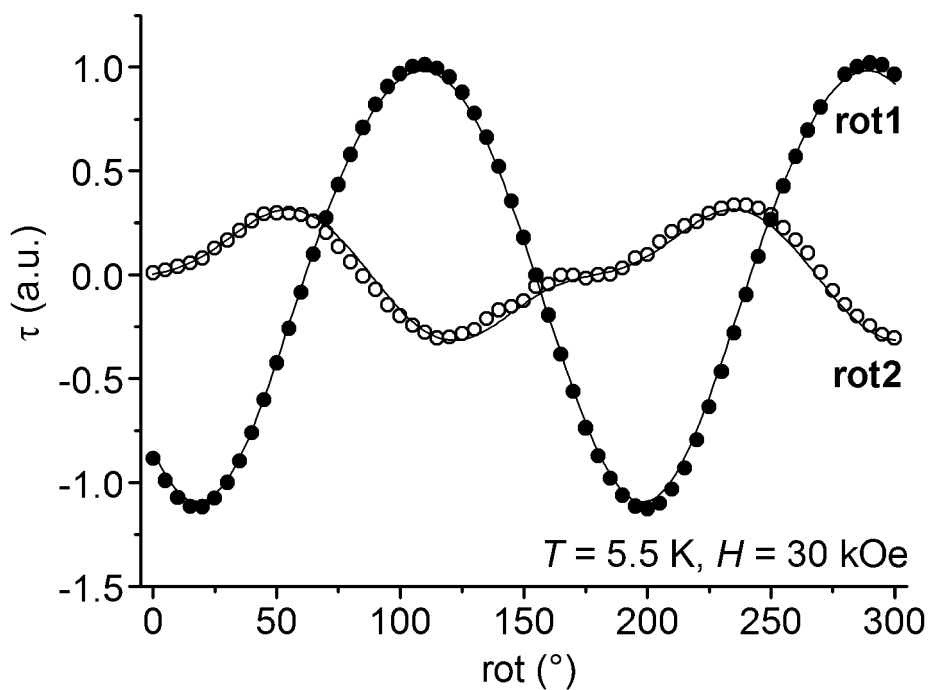

**Figure S7.** Torque signal for **rot1** and **rot2** at 5.5 K and 30 kOe. The cantilever was sensitive to the torque component along the green and blue arrows, respectively, in Fig. 3. The solid curves were calculated with the spin-Hamiltonian parameters, scale factors and angular offsets that provide the best fit to the 2.3 K data in Figs. 4 and 5.

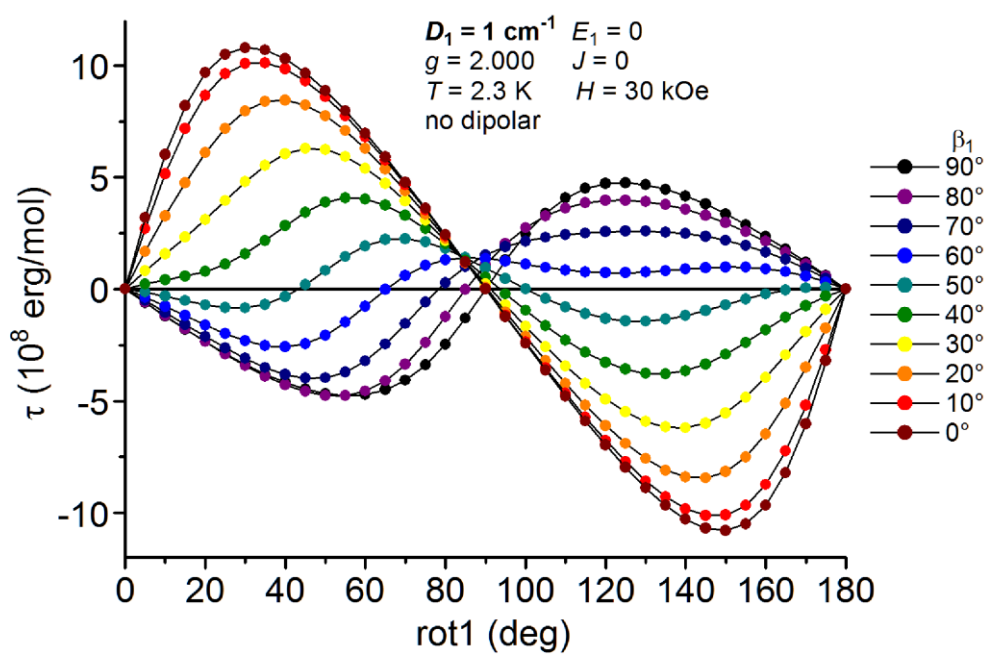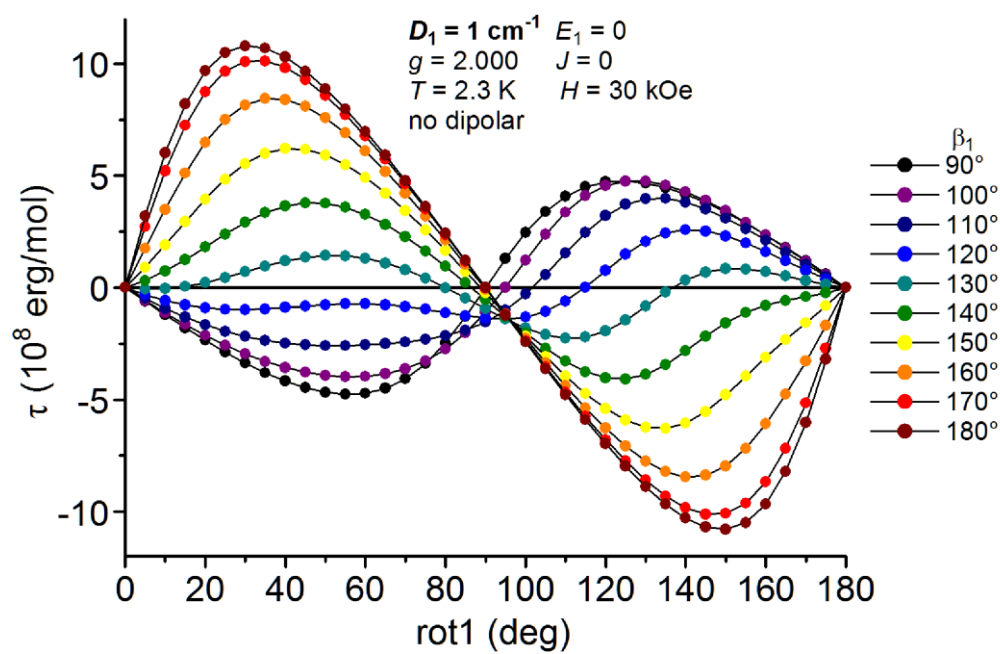

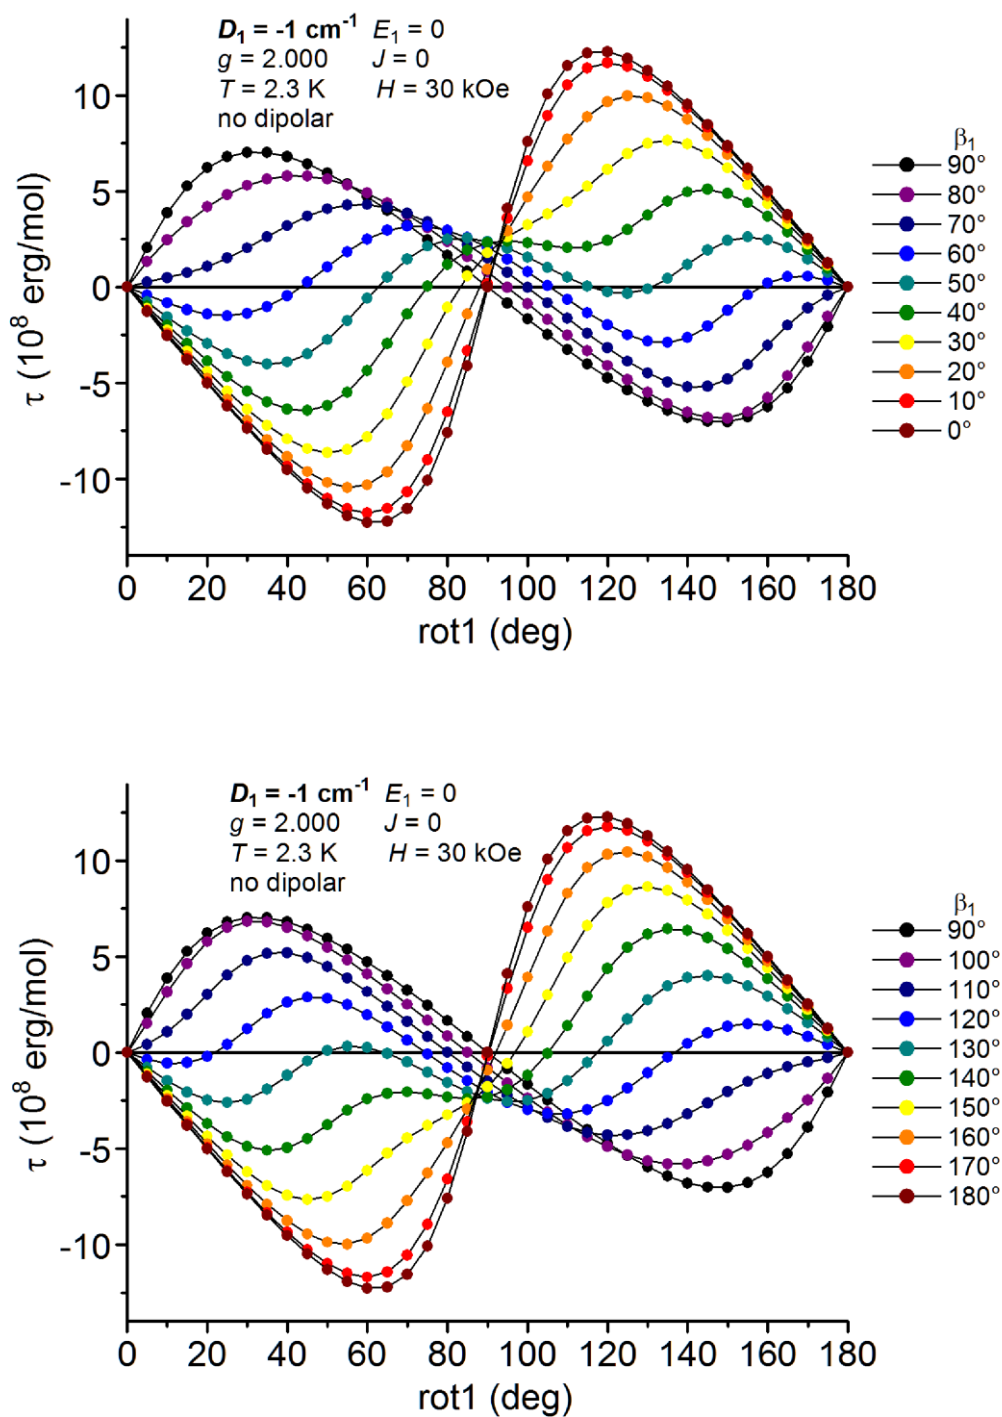

**Fig. S8** Torque signal for **rot1** calculated with the indicated set of spin Hamiltonian parameters and for different values of the Euler angle  $\beta_1$ . Here, an offset of  $+27.74^\circ$  was added to the rotation angle as defined in Fig. 3, so that at  $\text{rot1} = 0$  the magnetic field is directed along the **c** axis. The reported component of the torque is that along the green arrow in Fig. 3. Notice that curves are antisymmetric with respect to  $\text{rot1} = 0 \pmod{90}$  only for  $\beta_1 = 0, 90^\circ$  and  $180^\circ$ .

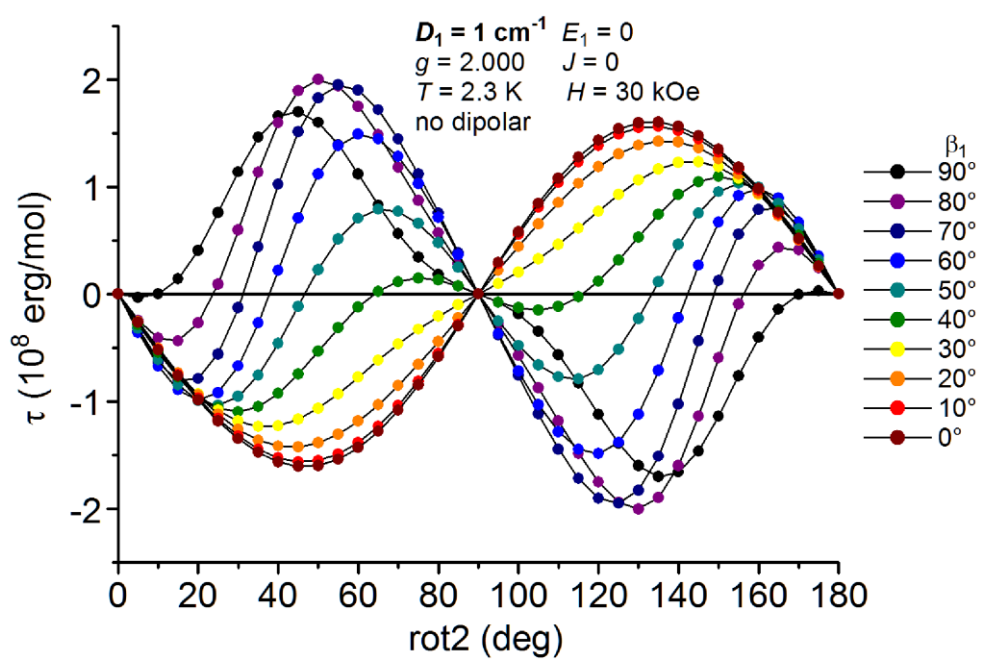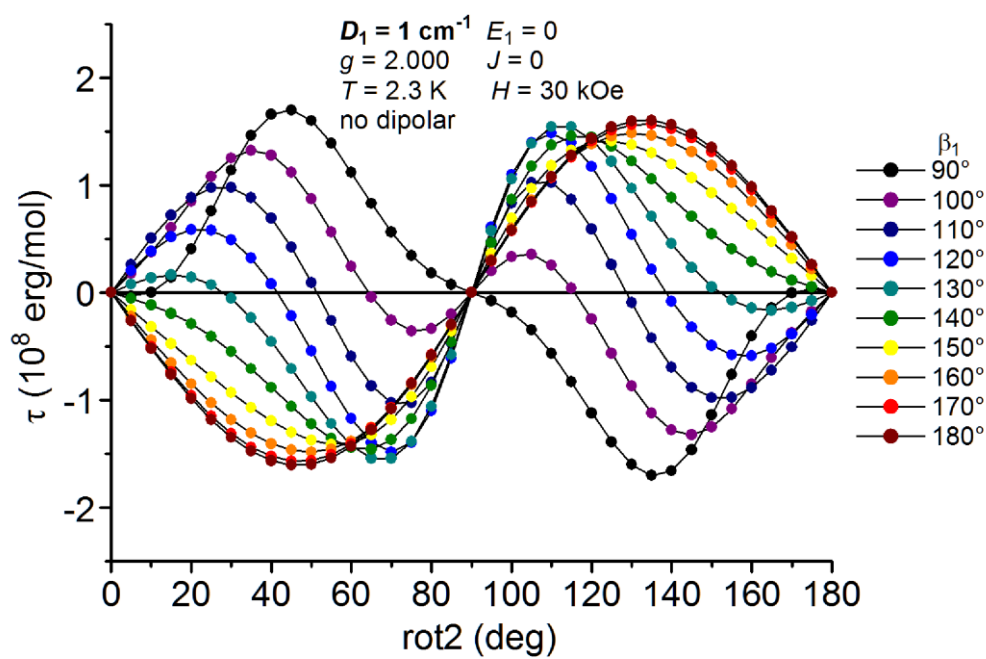

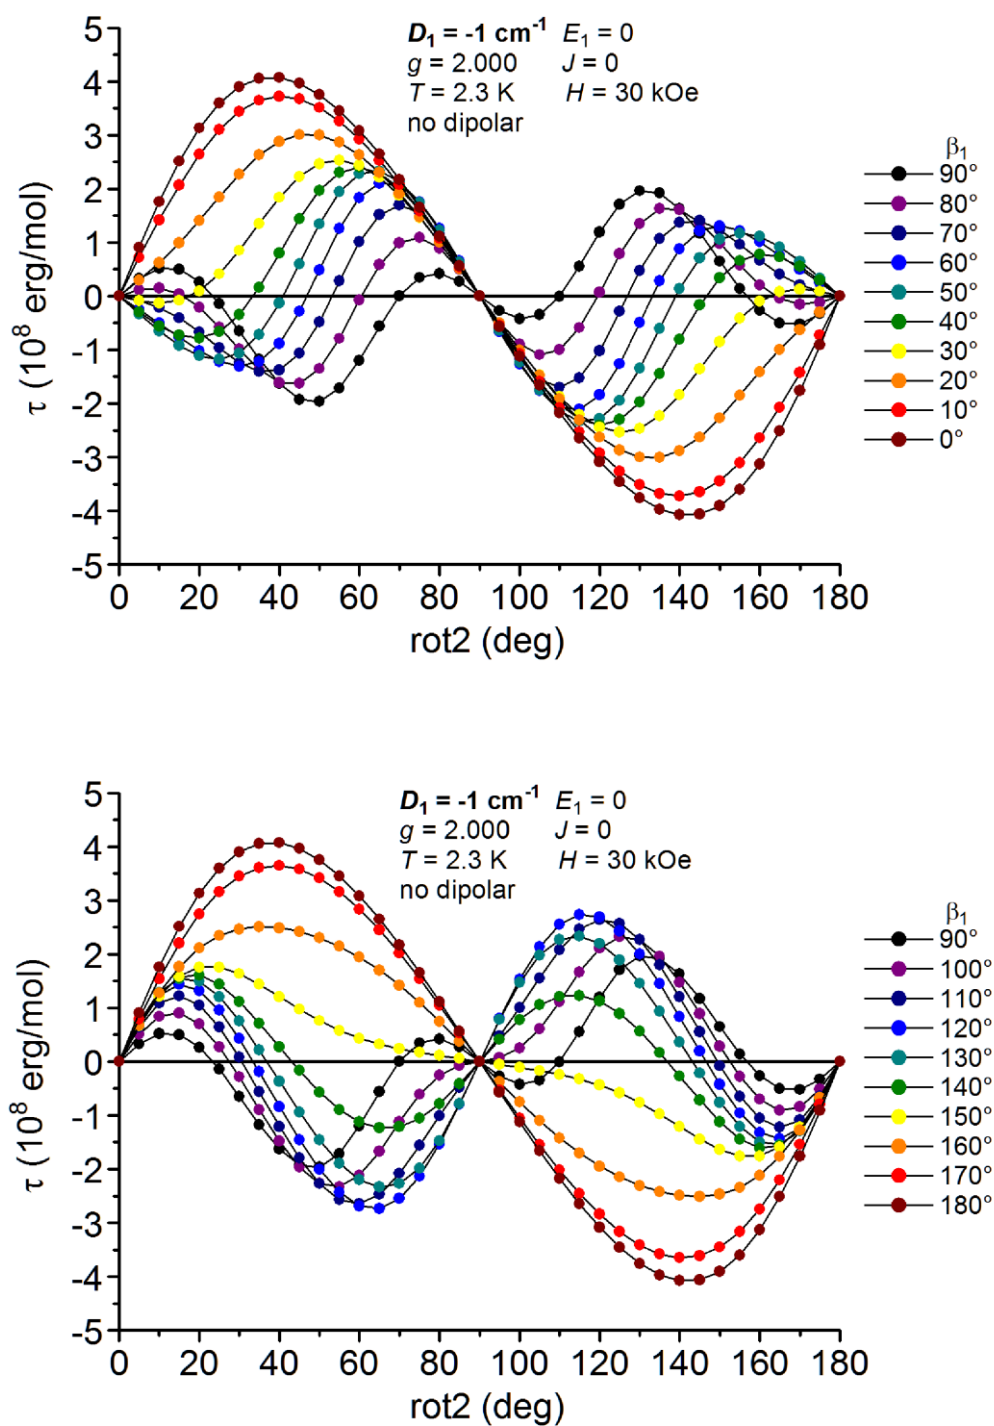

**Fig. S9** Torque signal for **rot2** calculated with the indicated set of spin Hamiltonian parameters and for different values of the Euler angle  $\beta_1$ . Here, the rotation angle is the same as defined in Fig. 3, so that at  $\text{rot2} = 0$  the magnetic field is directed along the **b** axis. The reported component of the torque is that along the blue arrow in Fig. 3. Notice that all curves are antisymmetric with respect to  $\text{rot2} = 0 \pmod{90}$ .

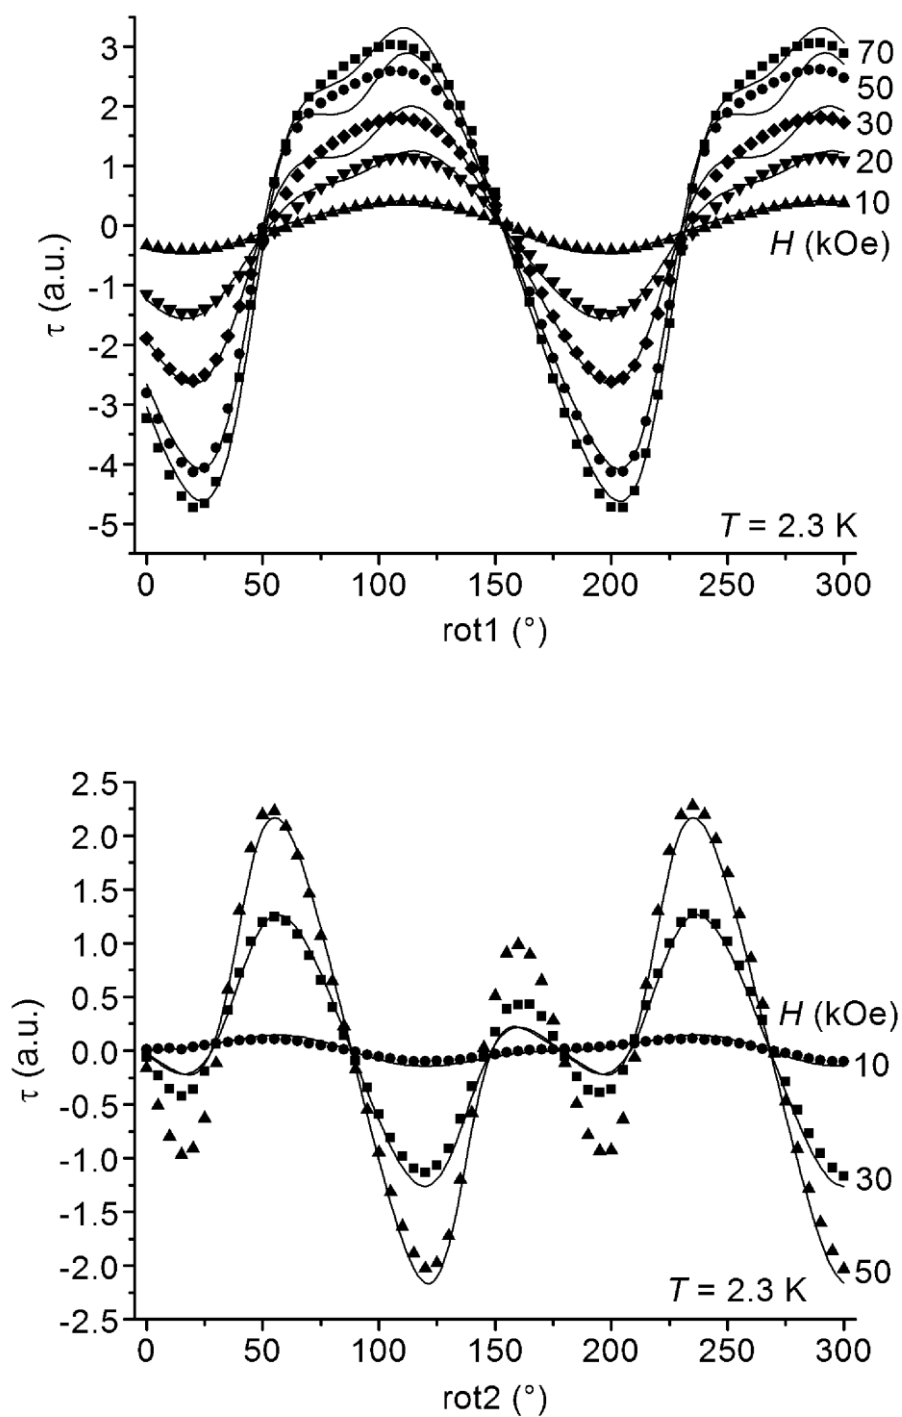

**Fig. S10** Best-fit simulation of torque data at 2.3 K with  $D_1 < 0$  ( $D_1 = -1.34(3) \text{ cm}^{-1}$ ,  $E_1 = -0.320(18) \text{ cm}^{-1}$ ,  $J = 0.066(7) \text{ cm}^{-1}$ ,  $\beta_1 = 35.1(4)^\circ$ ,  $k_1 = 0.304(7)$ ,  $k_2 = 0.368(10)$ ,  $\theta_1 = -0.61(19)^\circ$ ,  $\theta_2 = 1.8(3)^\circ$ ,  $\chi^2 = 2.87 \times 10^{-2}$ ).

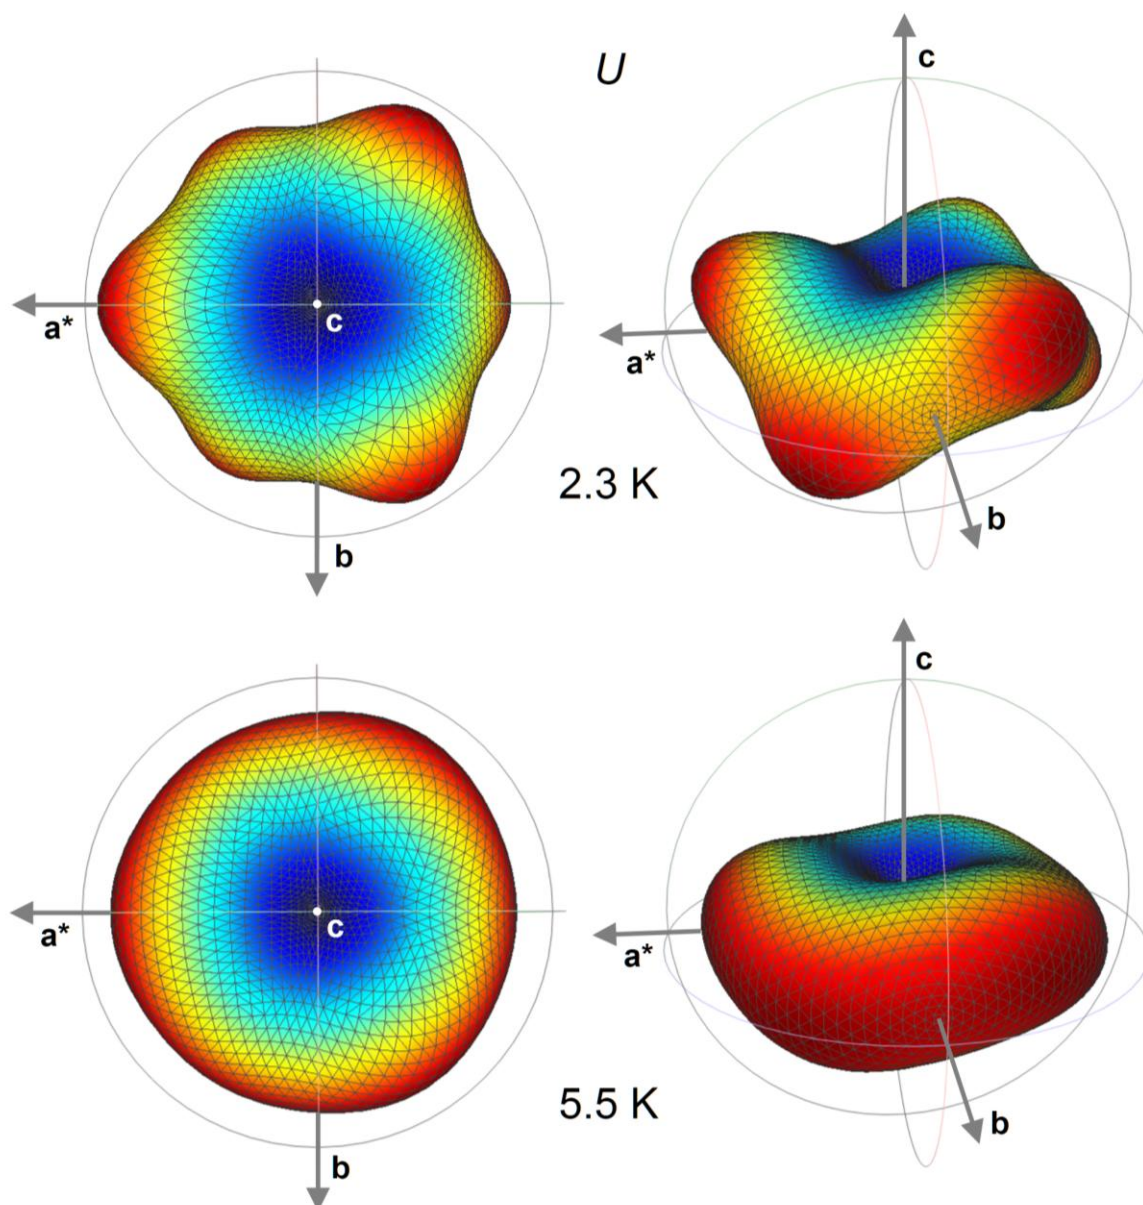

**Fig. S11** Internal energy surfaces of  $\text{Fe}_3\text{La}$  computed with the set of best-fit spin Hamiltonian parameters for different orientations of a 30-kOe magnetic field at 2.3 and 5.5 K. The distance from the centre of the diagram is proportional to  $U - U_{\min}$ , where  $U_{\min}$  is the minimum value of the internal energy that is found when the field is applied along  $c$ . The angular dependence of  $U$  is also displayed using a colour scale (from blue to red).



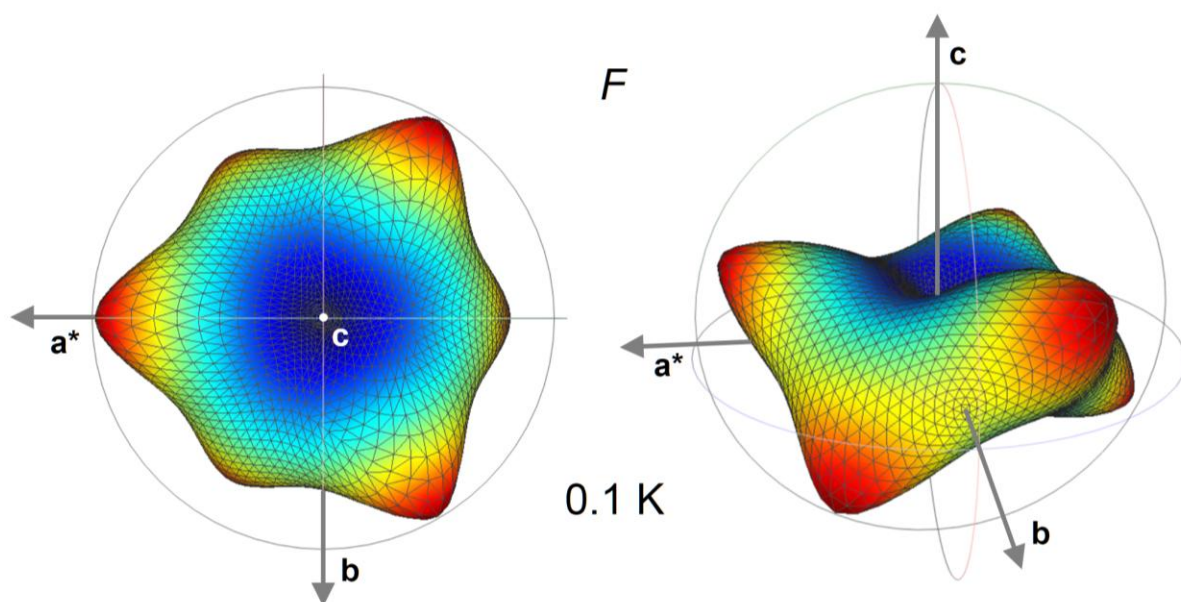

**Fig. S12** Free energy surface of  $\text{Fe}_3\text{La}$  computed with the set of best-fit spin Hamiltonian parameters for different orientations of a 30-kOe magnetic field at 0.1 K. The distance from the centre of the diagram is proportional to  $F - F_{\min}$ , where  $F_{\min}$  is the minimum value of the free energy that is found when the field is applied along  $c$ . The angular dependence of  $F$  is also displayed using a colour scale (from blue to red).



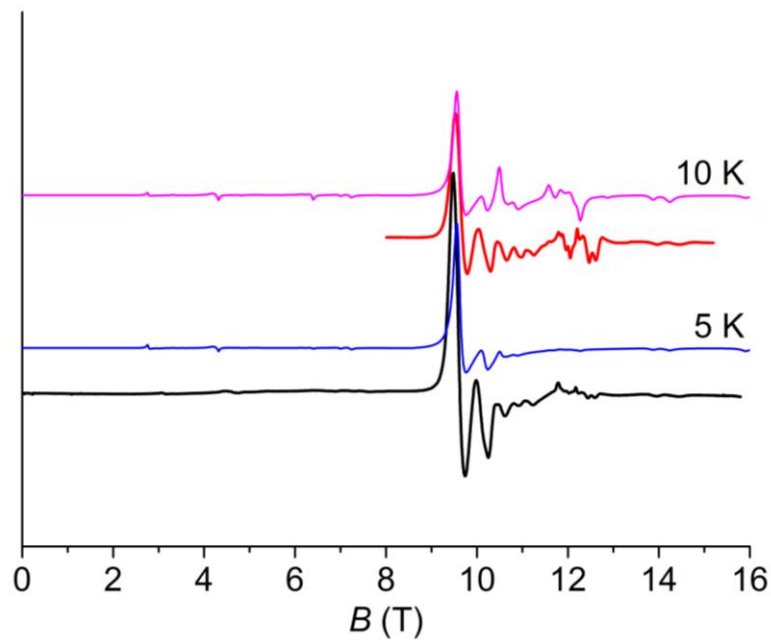

**Fig. S13** EPR powder spectra (331.2 GHz) of **Fe<sub>3</sub>La** at 5 and 10 K. Experimental spectra are drawn in black and red, while blue and pink curves are calculated spectra for independent ( $J = 0$ ) iron(III) sites with  $D_1 = 0.95 \text{ cm}^{-1}$ ,  $E_1 = 0.04 \text{ cm}^{-1}$ ,  $D_2 = D_3 = 1.12 \text{ cm}^{-1}$ ,  $E_2 = E_3 = 0$ ,  $\Delta D_1 = 0.02 \text{ cm}^{-1}$ ,  $\Delta D_2 = \Delta D_3 = 0.04 \text{ cm}^{-1}$  and an isotropic  $g = 2.00$  in all cases.

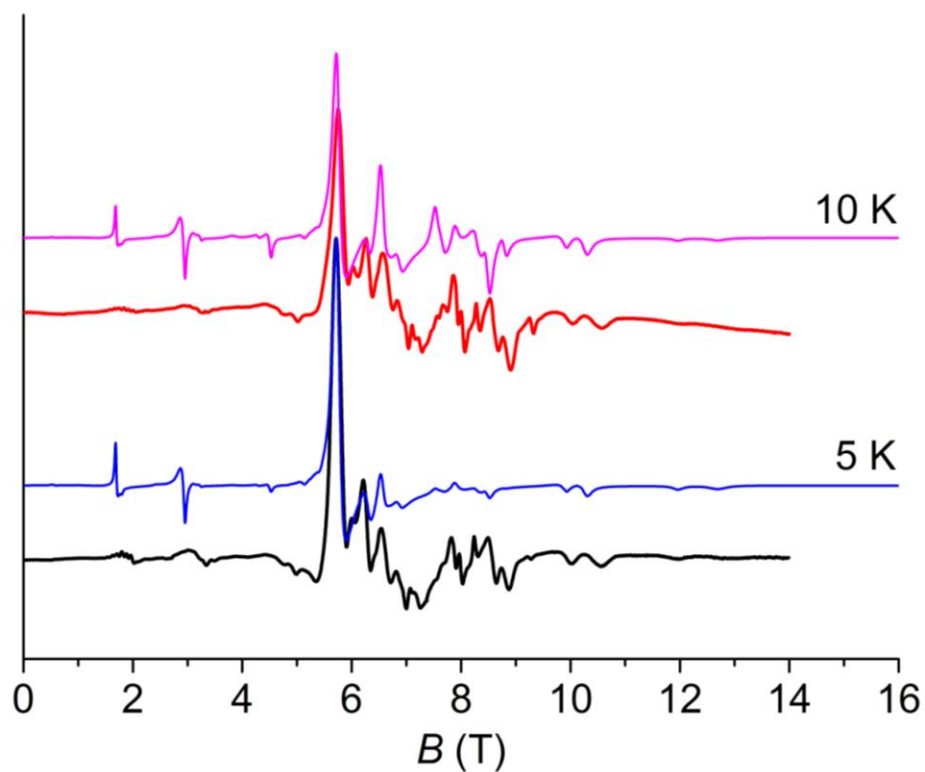

**Fig. S14** EPR powder spectra (220.8 GHz) of **Fe<sub>3</sub>La** at 5 and 10 K. Experimental spectra are drawn in black and red, while blue and pink curves are calculated spectra for independent ( $J = 0$ ) iron(III) sites with  $D_1 = 0.95 \text{ cm}^{-1}$ ,  $E_1 = 0.04 \text{ cm}^{-1}$ ,  $D_2 = D_3 = 1.12 \text{ cm}^{-1}$ ,  $E_2 = E_3 = 0$ ,  $\Delta D_1 = 0.02 \text{ cm}^{-1}$ ,  $\Delta D_2 = \Delta D_3 = 0.04 \text{ cm}^{-1}$  and an isotropic  $g = 2.00$  in all cases.

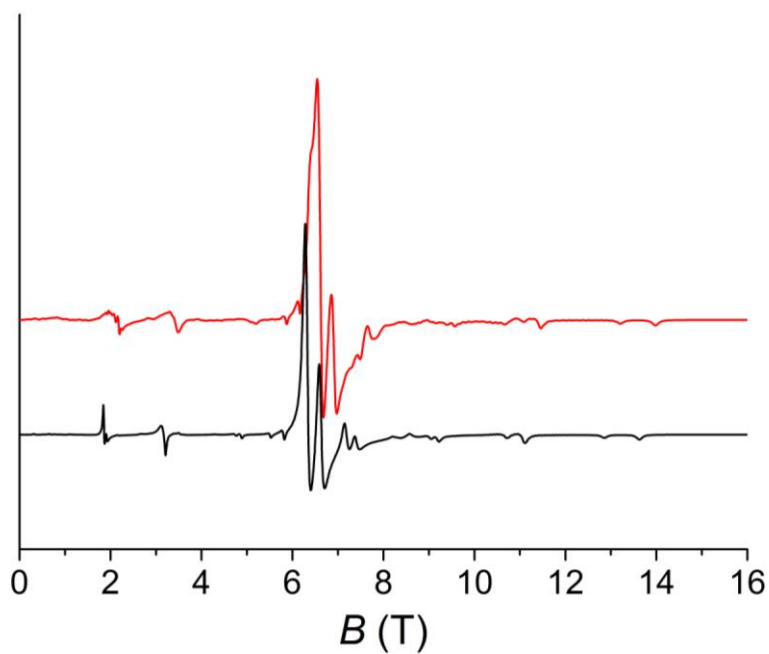

(a)

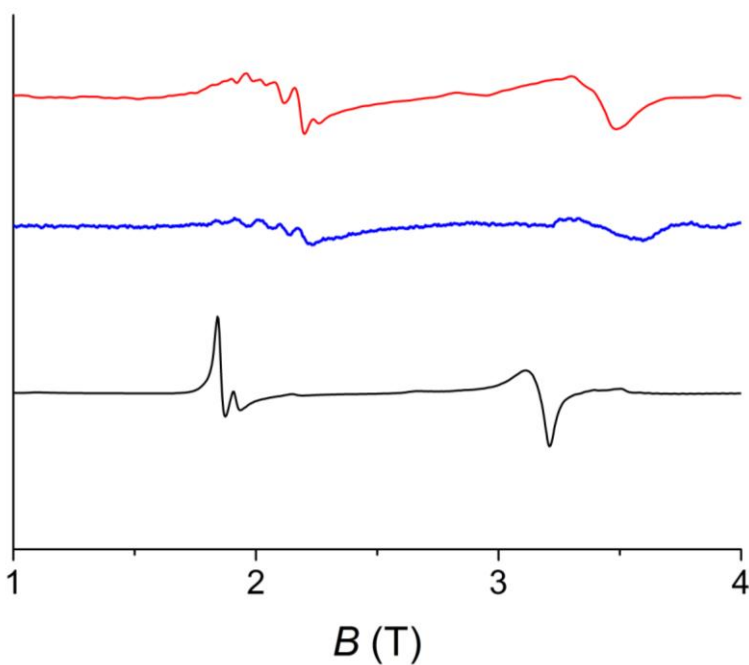

(b)

**Fig. S15** (a) Calculated EPR powder spectra at 240.0 GHz and 5 K with  $D_1 = 1.00 \text{ cm}^{-1}$ ,  $D_2 = D_3 = 1.18 \text{ cm}^{-1}$ ,  $E_1 = E_2 = E_3 = 0$ ,  $\beta_1 = \beta_2 = \beta_3 = 90^\circ$  and an isotropic  $g = 2.00$ . The black and red curves correspond to  $J = 0$  and  $J = 0.064 \text{ cm}^{-1}$ , respectively. (b) Zoom over the forbidden transitions together with the experimental spectrum of **Fe<sub>3</sub>La** (blue curve).

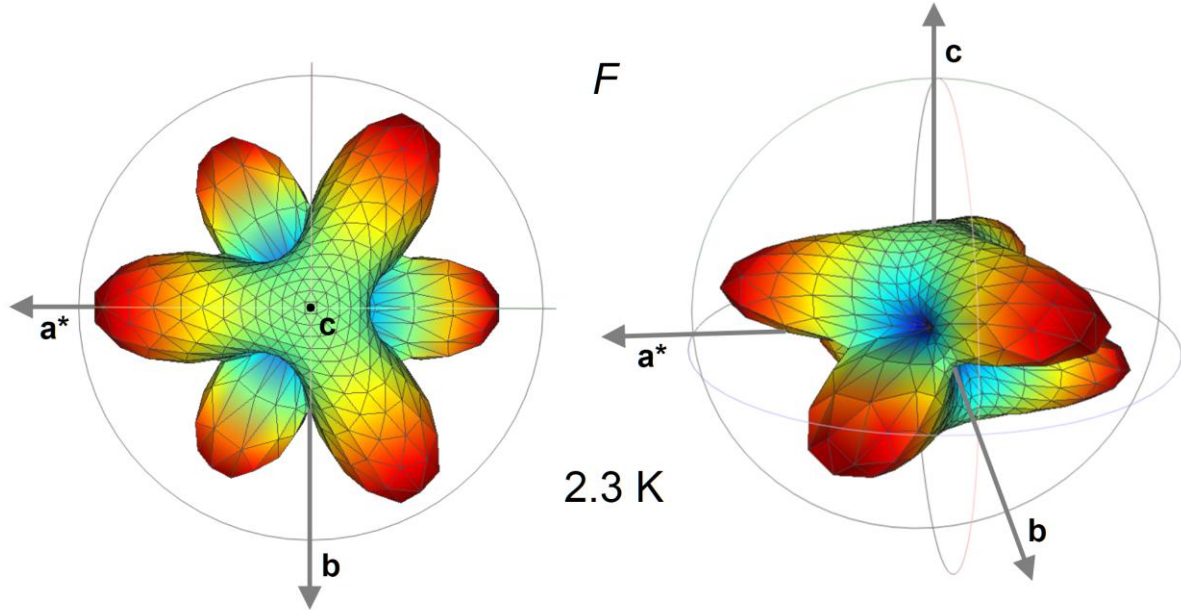

**Fig. S16** Free energy surface of  $\text{Fe}_4$  computed using van Wüllen single-ion parameters for different orientations of a 30-kOe magnetic field at 2.3 K. The axial components  $B_2^0 \hat{O}_2^0$ ,  $B_4^0 \hat{O}_4^0$  and  $B_6^0 \hat{O}_6^0$  have been subtracted from the data to better display the high-order modulations arising from  $B_4^3 \hat{O}_4^3$ ,  $B_6^3 \hat{O}_6^3$  and  $B_6^6 \hat{O}_6^6$ . The distance from the centre of the diagram is proportional to  $F - F_{\min}$ , where  $F_{\min}$  is the minimum value of the free energy that is found when the field is applied along  $\mathbf{c}$ . The angular dependence of  $F$  is also displayed using a colour scale (from blue to red). The best-fit set of parameters required to reproduce the pristine free energy surface is:  $D(5) = 3B_2^0 = -0.433 \text{ cm}^{-1}$ ,  $B_4^0 = 1.51 \times 10^{-5} \text{ cm}^{-1}$ ,  $B_4^3 = 8.95 \times 10^{-5} \text{ cm}^{-1}$ ,  $B_6^0 = 1.74 \times 10^{-8} \text{ cm}^{-1}$ ,  $B_6^3 = -1.10 \times 10^{-7} \text{ cm}^{-1}$  and  $B_6^6 = 6.09 \times 10^{-8} \text{ cm}^{-1}$ .
